# Supplementary material for: SIRT2 Deficiency Aggravates Diet-Induced Nonalcoholic Fatty Liver Disease through Modulating Gut Microbiota and Metabolites
Source: MDPI journal article supplement (doi:10.3390/ijms24108970), 2023-05-18
Supplement: s1 [file s1]

**Supplementary Table S1. Metabolite profiling of the serum from SIRT2 KO and SIRT2 WT mice fed with HFCS by UHPLC-QTOF-MS (SIRT2 KO vs. SIRT2 WT).**

| Metabolites                                       | FC     | Log2(FC) | P-value |
|---------------------------------------------------|--------|----------|---------|
| L-Urobilin                                        | 8.9179 | 3.1567   | 0.0248  |
| 3-Ureidopropionic acid                            | 7.9253 | 2.9865   | 0.0149  |
| p-Cresol sulfate                                  | 6.9978 | 2.8069   | 0.0457  |
| Dihydrothymine                                    | 5.6652 | 2.5021   | 0.0006  |
| Vinylacetylglycine                                | 5.5378 | 2.4693   | 0.0413  |
| Genistein                                         | 5.3704 | 2.4250   | 0.0299  |
| Daidzein                                          | 4.3283 | 2.1138   | 0.0272  |
| L-Proline                                         | 3.6006 | 1.8482   | 0.0209  |
| p-Anisic acid                                     | 3.5743 | 1.8377   | 0.0047  |
| 5-Methoxyindoleacetate                            | 3.5447 | 1.8256   | 0.0168  |
| p-Aminobenzoic acid                               | 3.4579 | 1.7899   | 0.0210  |
| (E)-2-Butenal                                     | 3.4114 | 1.7704   | 0.0181  |
| Dihydrouracil                                     | 3.3097 | 1.7267   | 0.0134  |
| Alanylglycine                                     | 3.2853 | 1.7160   | 0.0002  |
| N-trans-Feruloyl-4-O-methyldopamine               | 3.0096 | 1.5896   | 0.0018  |
| 1-Cyano-2-hydroxy-3-butene                        | 3.0024 | 1.5861   | 0.0274  |
| FAHFA (14:0/16:2)                                 | 2.7817 | 1.4760   | 0.0099  |
| 12-Hydroxydodecanoic acid                         | 2.5132 | 1.3295   | 0.0311  |
| PC (9:0/26:1)                                     | 2.4043 | 1.2656   | 0.0156  |
| FAHFA (18:0/14:1)                                 | 2.3438 | 1.2288   | 0.0435  |
| (R)-3-Hydroxy-tetradecanoic acid                  | 2.2721 | 1.1840   | 0.0247  |
| Verimol D                                         | 2.2368 | 1.1614   | 0.0232  |
| Tropic acid                                       | 2.2085 | 1.1431   | 0.0374  |
| Succinic acid                                     | 2.0676 | 1.0480   | 0.0307  |
| Myristic acid                                     | 2.0031 | 1.0022   | 0.0022  |
| 1H-Indole-3-carboxaldehyde                        | 1.9289 | 0.9478   | 0.0010  |
| 2,6 Dimethylheptanoyl carnitine                   | 1.8360 | 0.8765   | 0.0184  |
| (3beta,23E)-3-Hydroxy-27-norcycloart-23-en-25-one | 1.8076 | 0.8540   | 0.0115  |
| 7-Methylguanine                                   | 1.8022 | 0.8498   | 0.0485  |
| FAHFA (16:1/22:3)                                 | 1.7704 | 0.8241   | 0.0434  |
| Hypogeic acid                                     | 1.7287 | 0.7897   | 0.0334  |
| Oleoyl glycine                                    | 1.6750 | 0.7442   | 0.0331  |
| 1,11-Undecanedicarboxylic acid                    | 1.6702 | 0.7401   | 0.0468  |
| FAHFA (16:1/18:3)                                 | 1.6382 | 0.7121   | 0.0309  |
| Prehumulinic acid                                 | 1.6080 | 0.6853   | 0.0440  |
| Ercalcitriol                                      | 1.5422 | 0.6250   | 0.0398  |
| PG (18:2/20:4)                                    | 1.5161 | 0.6004   | 0.0065  |
| Creatinine                                        | 1.5150 | 0.5994   | 0.0097  |
| Falcarinone                                       | 1.5073 | 0.5920   | 0.0136  |

|                                                                                               |        |         |        |
|-----------------------------------------------------------------------------------------------|--------|---------|--------|
| Alpha-dimorphelic acid                                                                        | 1.4475 | 0.5335  | 0.0133 |
| (9S,10E,12Z,15Z)-9-Hydroxy-10,12,15-octadecatrienoic acid                                     | 1.4453 | 0.5314  | 0.0287 |
| 2-Phenylpropanal                                                                              | 1.4424 | 0.5285  | 0.0359 |
| FAHFA (18:1/22:3)                                                                             | 1.3932 | 0.4784  | 0.0100 |
| (2R)-2-Hydroxy-2-methylbutanenitrile                                                          | 1.3304 | 0.4119  | 0.0470 |
| 8,15-DiHETE                                                                                   | 1.3283 | 0.4096  | 0.0371 |
| 1,2,3,4-Tetrahydro-1-[1-hydroxy-3-(4-hydroxyphenyl)-2-propenyl]-7-methoxy-2,6-naphthalenediol | 1.2856 | 0.3624  | 0.0095 |
| L-Pyroglutamic acid                                                                           | 1.2562 | 0.3291  | 0.0102 |
| Cyanuric acid                                                                                 | 1.2494 | 0.3212  | 0.0150 |
| N-Desmethyltramadol                                                                           | 1.2254 | 0.2932  | 0.0167 |
| Mizolastine                                                                                   | 1.2157 | 0.2818  | 0.0483 |
| 4-Pentenoic acid                                                                              | 1.1865 | 0.2467  | 0.0127 |
| 1-Methyl-2-pyrrolicarboxaldehyde                                                              | 1.1742 | 0.2316  | 0.0409 |
| 2,6-Dimethylpyridine                                                                          | 1.1653 | 0.2208  | 0.0100 |
| Suberylglycine                                                                                | 1.1573 | 0.2107  | 0.0225 |
| 5,7alpha-Dihydro-1,4,4,7a-tetramethyl-4H-indene                                               | 1.1542 | 0.2069  | 0.0344 |
| Colubrinic acid                                                                               | 1.1346 | 0.1822  | 0.0257 |
| Safrole                                                                                       | 1.1312 | 0.1779  | 0.0353 |
| Lithocholic acid glycine conjugate                                                            | 1.1278 | 0.1735  | 0.0193 |
| O-Toluidine                                                                                   | 1.1199 | 0.1633  | 0.0415 |
| Enrofloxacin                                                                                  | 1.1165 | 0.1590  | 0.0207 |
| 1-Methyl-1,3-cyclohexadiene                                                                   | 1.1156 | 0.1579  | 0.0208 |
| MG (18:2(9Z,12Z)/0:0/0:0)                                                                     | 1.1100 | 0.1505  | 0.0028 |
| Simulansine                                                                                   | 1.1069 | 0.1465  | 0.0111 |
| alpha-Terpineol propanoate                                                                    | 1.0921 | 0.1272  | 0.0052 |
| Androstenol                                                                                   | 1.0899 | 0.1242  | 0.0221 |
| Equol                                                                                         | 1.0856 | 0.1185  | 0.0497 |
| Prolyl-Tyrosine                                                                               | 1.0856 | 0.1185  | 0.0497 |
| LysoPC(22:2(13Z,16Z))                                                                         | 1.0856 | 0.1185  | 0.0497 |
| (4E)-1,7-bis(4-hydroxyphenyl)hept-4-en-3-one                                                  | 1.0747 | 0.1039  | 0.0414 |
| Diethylphosphate                                                                              | 1.0693 | 0.0966  | 0.0261 |
| 2-acetyl-1-alkyl-sn-glycero-3-phosphocholine                                                  | 0.8288 | -0.2710 | 0.0164 |
| LPC (18:0)                                                                                    | 0.7986 | -0.3245 | 0.0024 |
| Phosphorylcholine                                                                             | 0.7933 | -0.3340 | 0.0443 |
| Pedalitin                                                                                     | 0.7243 | -0.4653 | 0.0443 |
| 1-(5Z,8Z,11Z,14Z-eicosatetraenoyl)-sn-glycero-3-phosphate                                     | 0.7213 | -0.4713 | 0.0260 |
| Homoarecoline                                                                                 | 0.7141 | -0.4859 | 0.0471 |
| LysoPC(P-18:1(9Z))                                                                            | 0.7060 | -0.5023 | 0.0350 |
| Uric acid                                                                                     | 0.6726 | -0.5722 | 0.0168 |
| 1-Arachidonoylglycerophosphoinositol                                                          | 0.6652 | -0.5881 | 0.0306 |
| N'-Formylkynurenine                                                                           | 0.6542 | -0.6121 | 0.0107 |
| Sclareol                                                                                      | 0.6458 | -0.6308 | 0.0062 |
| Graveoline                                                                                    | 0.6339 | -0.6576 | 0.0033 |

|                                     |        |         |        |
|-------------------------------------|--------|---------|--------|
| Glycerophosphocholine               | 0.6255 | -0.6769 | 0.0375 |
| LysoPC(22:5(4Z,7Z,10Z,13Z,16Z))     | 0.5999 | -0.7372 | 0.0426 |
| PC (18:5e/6:0)                      | 0.5993 | -0.7387 | 0.0056 |
| PC (18:4e/4:0)                      | 0.5862 | -0.7707 | 0.0031 |
| LPC (20:3)                          | 0.5851 | -0.7733 | 0.0427 |
| ACar(8:1)                           | 0.5789 | -0.7886 | 0.0387 |
| LysoPC(22:6(4Z,7Z,10Z,13Z,16Z,19Z)) | 0.5756 | -0.7968 | 0.0060 |
| Uric acid                           | 0.5650 | -0.8238 | 0.0434 |
| LPC (22:3)                          | 0.5551 | -0.8491 | 0.0061 |
| Docosapentaenoic acid (22n-3)       | 0.5379 | -0.8945 | 0.0040 |
| D-Aspartic acid                     | 0.5177 | -0.9498 | 0.0451 |
| LPC (16:2)                          | 0.4959 | -1.0118 | 0.0331 |
| PC (2:0/20:2)                       | 0.4676 | -1.0968 | 0.0027 |
| LPC (22:4)                          | 0.4620 | -1.1139 | 0.0153 |
| LPI (18:2)                          | 0.4527 | -1.1433 | 0.0369 |
| Tetrahydrocortisone                 | 0.4390 | -1.1876 | 0.0214 |
| Pipercyclobutanamide B              | 0.4283 | -1.2232 | 0.0369 |
| FAHFA (15:0/22:3)                   | 0.4282 | -1.2238 | 0.0429 |
| LPC (22:5)                          | 0.4248 | -1.2350 | 0.0100 |
| LPE (22:5)                          | 0.4172 | -1.2611 | 0.0196 |
| LysoPC (20:2(11Z,14Z))              | 0.4164 | -1.2641 | 0.0066 |
| PC (14:1e/6:0)                      | 0.3873 | -1.3684 | 0.0119 |
| L-Carnitine                         | 0.3854 | -1.3756 | 0.0005 |
| 6-Aminopenicillanic acid            | 0.3795 | -1.3979 | 0.0312 |
| LPE (20:2)                          | 0.3716 | -1.4282 | 0.0360 |
| LPC (20:2)                          | 0.3676 | -1.4439 | 0.0004 |
| FAHFA (18:2/22:3)                   | 0.3480 | -1.5228 | 0.0429 |
| LPE (20:1)                          | 0.3409 | -1.5527 | 0.0176 |
| Epinephrine                         | 0.3166 | -1.6591 | 0.0088 |
| PC (22:6e/2:0)                      | 0.3105 | -1.6873 | 0.0016 |
| LysoPE (20:1(11Z)/0:0)              | 0.2802 | -1.8355 | 0.0136 |
| FAHFA (22:6/22:3)                   | 0.2782 | -1.8460 | 0.0216 |

**Supplementary Table S2. The differentially abundant metabolites enriched to the pathway by KEGG analysis.**

| KEGG pathway                   | Metabolites                   |
|--------------------------------|-------------------------------|
| Choline metabolism in cancer   | Phosphorylcholine             |
|                                | Glycerophosphocholine         |
|                                | lysophosphatidylcholine (LPC) |
| Glycerophospholipid metabolism | Phosphorylcholine             |
|                                | Glycerophosphocholine         |
|                                | Lysophosphatidylcholine (LPC) |

|                                             |                          |
|---------------------------------------------|--------------------------|
| PPAR signaling pathway                      | Alpha-dimorphocolic acid |
| D-Amino acid metabolism                     | L-Proline                |
|                                             | D-Aspartic acid          |
| Arginine and proline metabolism             | L-Proline                |
|                                             | Creatinine               |
| Adrenergic signaling in cardiomyocytes      | Epinephrine              |
| Regulation of lipolysis in adipocytes       | Epinephrine              |
| Bile secretion                              | L-Carnitine              |
|                                             | Uric acid                |
| Renin secretion                             | Epinephrine              |
| Thermogenesis                               | L-Carnitine              |
| Ether lipid metabolism                      | Glycerophosphocholine    |
| cAMP signaling pathway                      | Epinephrine              |
| Linoleic acid metabolism                    | Alpha-dimorphocolic acid |
| Alanine, aspartate and glutamate metabolism | D-Aspartic acid          |
| Mineral absorption                          | L-Proline                |

**Supplementary Table S3. The relative expression abundance of gut microbiota at the phylum level.**

| Phylum              | WT1   | WT2   | WT3   | KO1   | KO2   | KO3   |
|---------------------|-------|-------|-------|-------|-------|-------|
| p_Firmicutes        | 55.53 | 51.24 | 53.09 | 90.74 | 41.00 | 41.07 |
| p_Bacteroidota      | 2.58  | 17.37 | 24.42 | 0.63  | 9.33  | 29.96 |
| p_Verrucomicrobiota | 0.89  | 11.05 | 1.95  | 7.39  | 39.06 | 3.72  |
| p_Actinobacteriota  | 34.45 | 9.86  | 10.92 | 0.56  | 8.79  | 4.03  |
| p_Desulfobacterota  | 0.36  | 4.99  | 1.79  | 0.12  | 0.16  | 12.51 |
| p_Campylobacterota  | 5.60  | 0.58  | 5.14  | 0.03  | 0.18  | 7.12  |
| p_Proteobacteria    | 0.49  | 4.56  | 1.92  | 0.48  | 1.42  | 0.59  |
| p_Patescibacteria   | 0.06  | 0.04  | 0.03  | 0.03  | 0.03  | 0.39  |
| p_Deferribacterota  | 0.03  | 0.01  | 0.61  | 0.01  | 0.00  | 0.50  |
| p_unclassified      | 0.00  | 0.25  | 0.08  | 0.00  | 0.02  | 0.10  |
| p_Cyanobacteria     | 0.00  | 0.05  | 0.00  | 0.01  | 0.00  | 0.00  |
| p_Spirochaetota     | 0.01  | 0.00  | 0.05  | 0.00  | 0.00  | 0.00  |

**Supplementary Table S4. Top 30 of the differentially abundant gut microbiota at the genus level.**

| Genus                       | WT1   | WT2   | WT3   | KO1   | KO2   | KO3   |
|-----------------------------|-------|-------|-------|-------|-------|-------|
| Muribaculaceae_unclassified | 1.90  | 9.50  | 16.03 | 0.45  | 8.73  | 25.71 |
| Lactobacillus               | 18.15 | 1.16  | 9.33  | 1.28  | 24.90 | 12.78 |
| Allobaculum                 | 12.07 | 15.78 | 4.24  | 49.61 | 1.46  | 0.05  |
| Ligilactobacillus           | 1.70  | 0.52  | 2.73  | 3.75  | 0.61  | 0.55  |
| Akkermansia                 | 0.56  | 11.05 | 1.95  | 7.39  | 39.06 | 3.72  |
| Dubosiella                  | 3.74  | 9.04  | 1.51  | 14.96 | 0.08  | 3.41  |
| HT002                       | 6.18  | 0.26  | 8.35  | 0.55  | 7.41  | 1.84  |
| Coriobacteriaceae_UCG-002   | 17.39 | 8.05  | 3.79  | 0.20  | 4.00  | 2.11  |

|                                                  |       |       |       |      |      |       |
|--------------------------------------------------|-------|-------|-------|------|------|-------|
| Bifidobacterium                                  | 16.29 | 0.85  | 6.70  | 0.10 | 4.53 | 1.07  |
| Muribaculum                                      | 0.11  | 1.55  | 1.91  | 0.03 | 0.24 | 2.07  |
| Lachnospiraceae_unclassified                     | 0.77  | 2.07  | 2.51  | 2.35 | 0.52 | 6.38  |
| Helicobacter                                     | 5.60  | 0.58  | 5.14  | 0.03 | 0.18 | 7.12  |
| Desulfovibrio                                    | 0.20  | 0.77  | 0.31  | 0.12 | 0.13 | 12.38 |
| Lachnospiraceae_NK4A136_group                    | 0.54  | 0.64  | 1.01  | 0.48 | 0.52 | 4.02  |
| Eubacterium_coprostanoligenes_group_unclassified | 0.11  | 1.60  | 5.14  | 3.67 | 0.37 | 0.02  |
| Clostridia_UCG-014_unclassified                  | 0.19  | 2.05  | 0.55  | 0.03 | 0.41 | 1.21  |
| Parasutterella                                   | 0.31  | 4.27  | 1.75  | 0.25 | 0.69 | 0.54  |
| Bacteroides                                      | 0.22  | 5.29  | 2.12  | 0.02 | 0.08 | 0.09  |
| Dorea                                            | 1.80  | 0.51  | 3.62  | 0.88 | 1.17 | 0.06  |
| Sellimonas                                       | 0.42  | 0.81  | 0.87  | 4.04 | 0.09 | 0.00  |
| Alistipes                                        | 0.13  | 0.14  | 0.18  | 0.01 | 0.10 | 0.05  |
| Faecalibaculum                                   | 3.83  | 1.85  | 0.31  | 0.01 | 0.43 | 0.01  |
| Lactococcus                                      | 0.39  | 1.17  | 0.33  | 2.96 | 0.30 | 0.00  |
| Desulfovibrionaceae_unclassified                 | 0.16  | 4.24  | 1.56  | 0.01 | 0.03 | 0.11  |
| Clostridiales_unclassified                       | 0.26  | 0.33  | 1.29  | 0.07 | 0.17 | 1.94  |
| Parabacteroides                                  | 0.06  | 0.32  | 2.42  | 0.01 | 0.02 | 0.56  |
| Paramuribaculum                                  | 0.01  | 0.00  | 0.01  | 0.01 | 0.00 | 0.59  |
| Enterorhabdus                                    | 0.13  | 0.12  | 0.13  | 0.20 | 0.17 | 0.24  |
| Firmicutes_unclassified                          | 0.20  | 2.18  | 0.79  | 0.11 | 0.33 | 1.46  |
| Candidatus_Saccharimonas                         | 0.06  | 0.04  | 0.03  | 0.03 | 0.03 | 0.39  |
| Others                                           | 6.54  | 13.25 | 13.42 | 6.39 | 3.25 | 9.52  |

**Supplementary Table S5. Primer sequences for real-time qRT-PCR detection.**

| Genes                | Primer  | Sequence 5'–3'           |
|----------------------|---------|--------------------------|
| Mouse CHI3L1         | Forward | ATGCACACCTCTACTGAAGCC    |
|                      | Reverse | ACCAGCTTGTACGCAGAGC      |
| Mouse Col1a1         | Forward | CTGGCGGTTTCAGGTCCAAT     |
|                      | Reverse | TTCCAGGCAATCCACGAGC      |
| Mouse GDF15          | Forward | CAGTCCAGAGGTGAGATTGGG    |
|                      | Reverse | CAGGCGTGCTTTGATCTGC      |
| Mouse AKR1B10        | Forward | TGACACCTTCTCGAATACAGGA   |
|                      | Reverse | ATTCCGCATGGAAAGGGAAGT    |
| Mouse ACTA2          | Forward | GGCACCCTGAACCCTAAGG      |
|                      | Reverse | ACAATACCAGTTGTACGTCCAGA  |
| Mouse IL-6           | Forward | TCTATACCACTCACAAGTCGGA   |
|                      | Reverse | GAATTGCCATTGCACAACCTCTTT |
| Mouse IL-1 $\alpha$  | Forward | TGATGAAGCTCGTCAGGCAG     |
|                      | Reverse | AGGTGCACCCGACTTTGTTC     |
| Mouse IL-1 $\beta$   | Forward | GCAACTGTTCTGAACTCAACT    |
|                      | Reverse | ATCTTTTGGGGTCCGTCAACT    |
| Mouse $\beta$ -actin | Forward | GGCTGTATTCCCCTCCATCG     |

|                      |         |                        |
|----------------------|---------|------------------------|
| Mouse SIRT2          | Reverse | CCAGTTGGTAACAATGCCATGT |
|                      | Forward | CCACGGCACCTTCTACACATC  |
| Human SIRT2          | Reverse | CACCTGGGAGTTGCTTCTGAG  |
|                      | Forward | CACGCAGAACATAGATACCCTG |
| Human $\beta$ -actin | Reverse | CAGTGTGATGTGTAGAAGGTGC |
|                      | Forward | CATGTACGTTGCTATCCAGGC  |
|                      | Reverse | CTCCTTAATGTCACGCACGAT  |

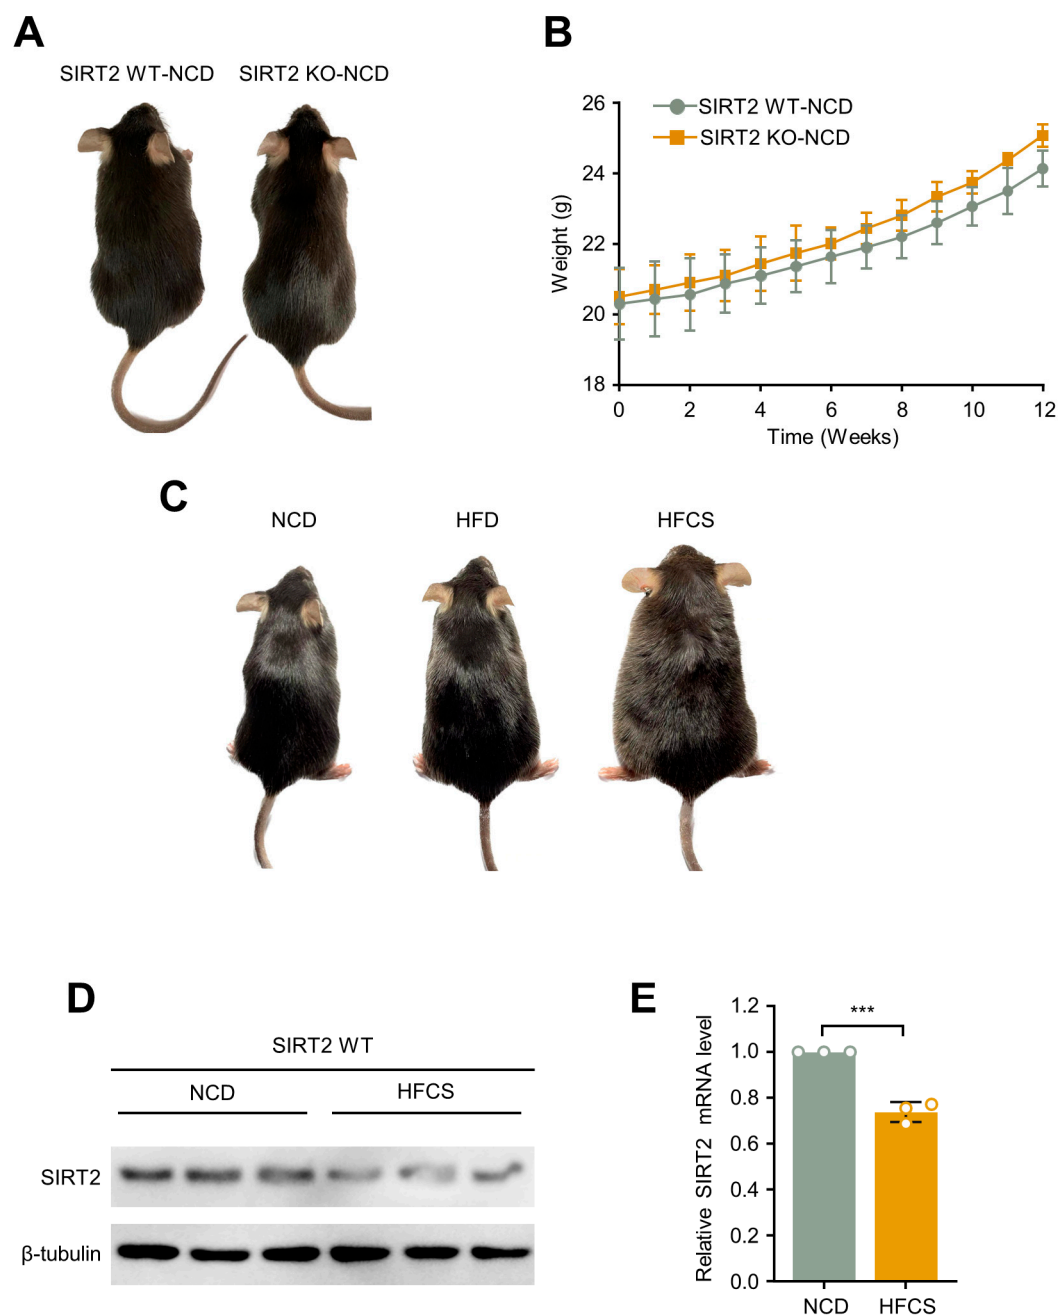

**Figure S1. HFCS diet induced mice obesity.** (A) The representative gross morphology and (B) the body weight of SIRT2 WT and SIRT2 KO mice with normal chow diet (NCD) for 12 weeks. (C) The representative gross morphology of SIRT2 WT mice fed with NCD, high-fat diet (HFD), or high-fat/high-cholesterol/high-sucrose (HFCS) diet for 12 weeks (D) Western blotting of the liver tissues from the SIRT2 WT mice with NCD or HFCS diet for 12 weeks to detect SIRT2, and three

representative mice from each group were selected for this experiment. (E) The mRNA levels of SIRT2 were analyzed in liver from SIRT2 WT mice with NCD or HFCS diet for 12 weeks (N=9/per group). \*\*\* $p < 0.001$ .

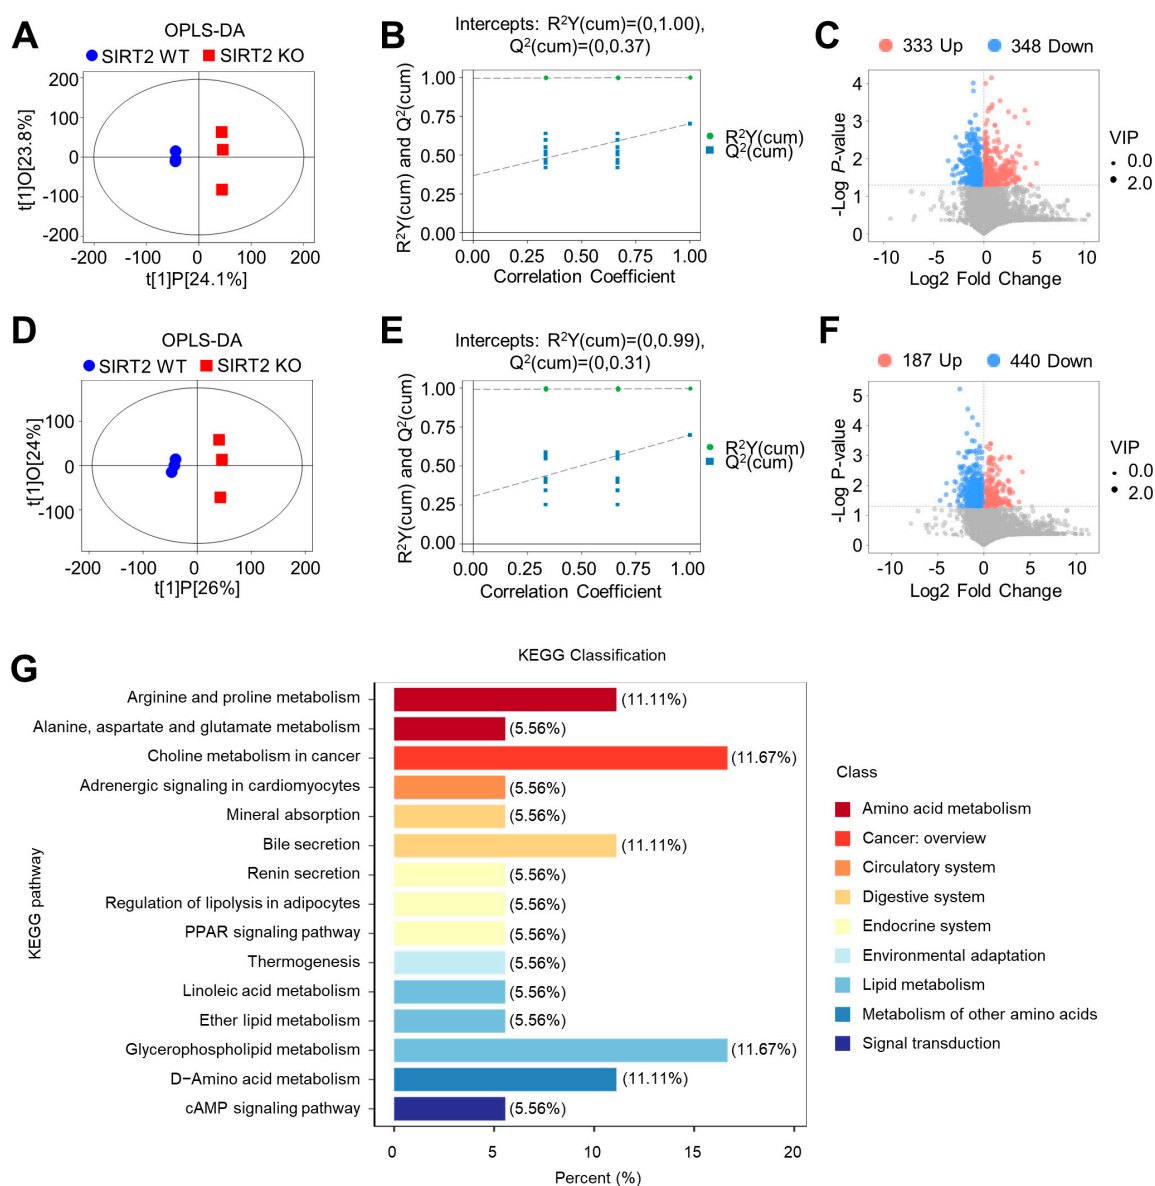

**Figure S2. SIRT2 deficiency modulated serum metabolome in mice with HFCS diet for 12 weeks.** Orthogonal projections to latent structures discriminant analysis (OPLS-DA) score plot was derived from metabolomics data tested in (A) positive and (D) negative ion mode, respectively. The OPLS-DA models of the (B) positive and (E) negative ion mode were validated by permutation test. Volcano plot shows the metabolites that were different between SIRT2 WT and SIRT2 KO mice, detected by the (C) positive ion and (F) negative ion mode. (G) KEGG analysis was conducted using all of the differential metabolites from both positive and negative ion modes (N=3/per group).

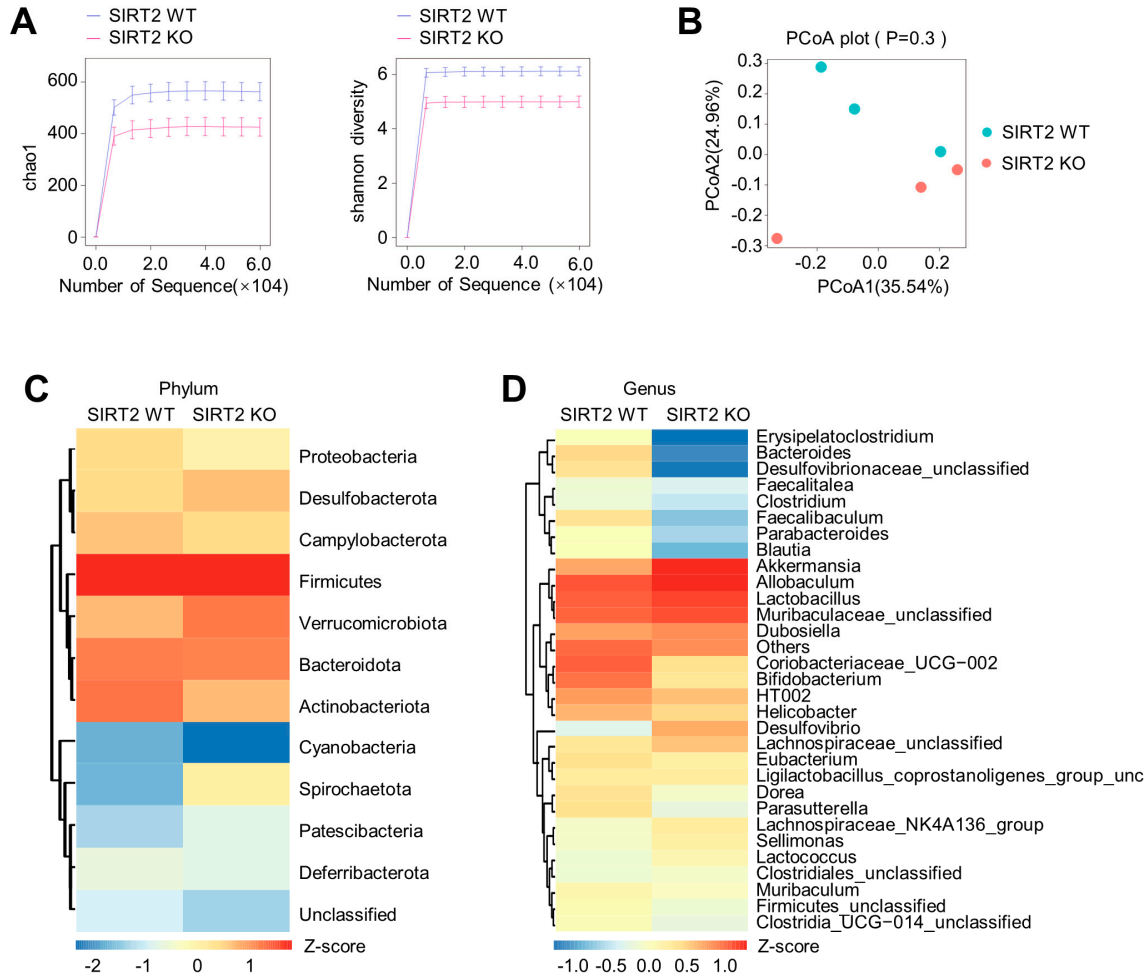

**Figure S3. Diversity and composition analysis of gut microbiota in mice with HFCS diet for 12 weeks.** (A) Chao1 and Shannon indexes respectively indicated the richness and diversity of the gut microbiota (N=3/per group). (B) Principal component ordination analysis (PCoA) chart of gut microbiota in mice with HFCS feeding for 12 weeks (N=3/per group). (C) Heatmap of hierarchical clustering analysis of gut microbiota at the phylum level in SIRT2 KO and SIRT2 WT mice (N=3/per group). (D) Heatmap of hierarchical clustering analysis of the top 30 gut microbiota at the genus level in SIRT2 KO and SIRT2 WT mice (N=3/per group). The “\_unc” means “\_unclassified”.



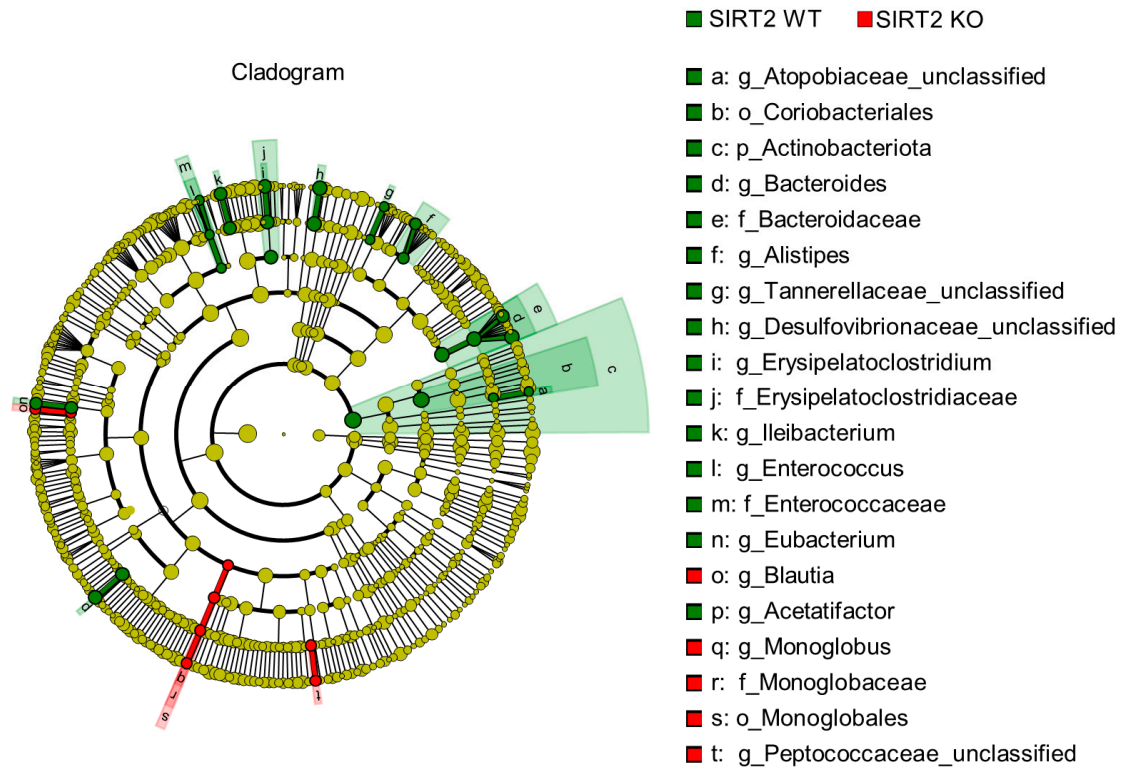

**Figure S4. SIRT2 deficiency promoted the intestinal microbiota dysbiosis.** Taxonomic cladogram generated by LEfSe analysis showed the taxa significantly enriched in the SIRT2 WT (green), and SIRT2 KO (red) mice. The circles from inside to outside represent taxonomic levels from domain to species, and the size of each dot represents the relative abundance of the corresponding taxon (N=3/per group).

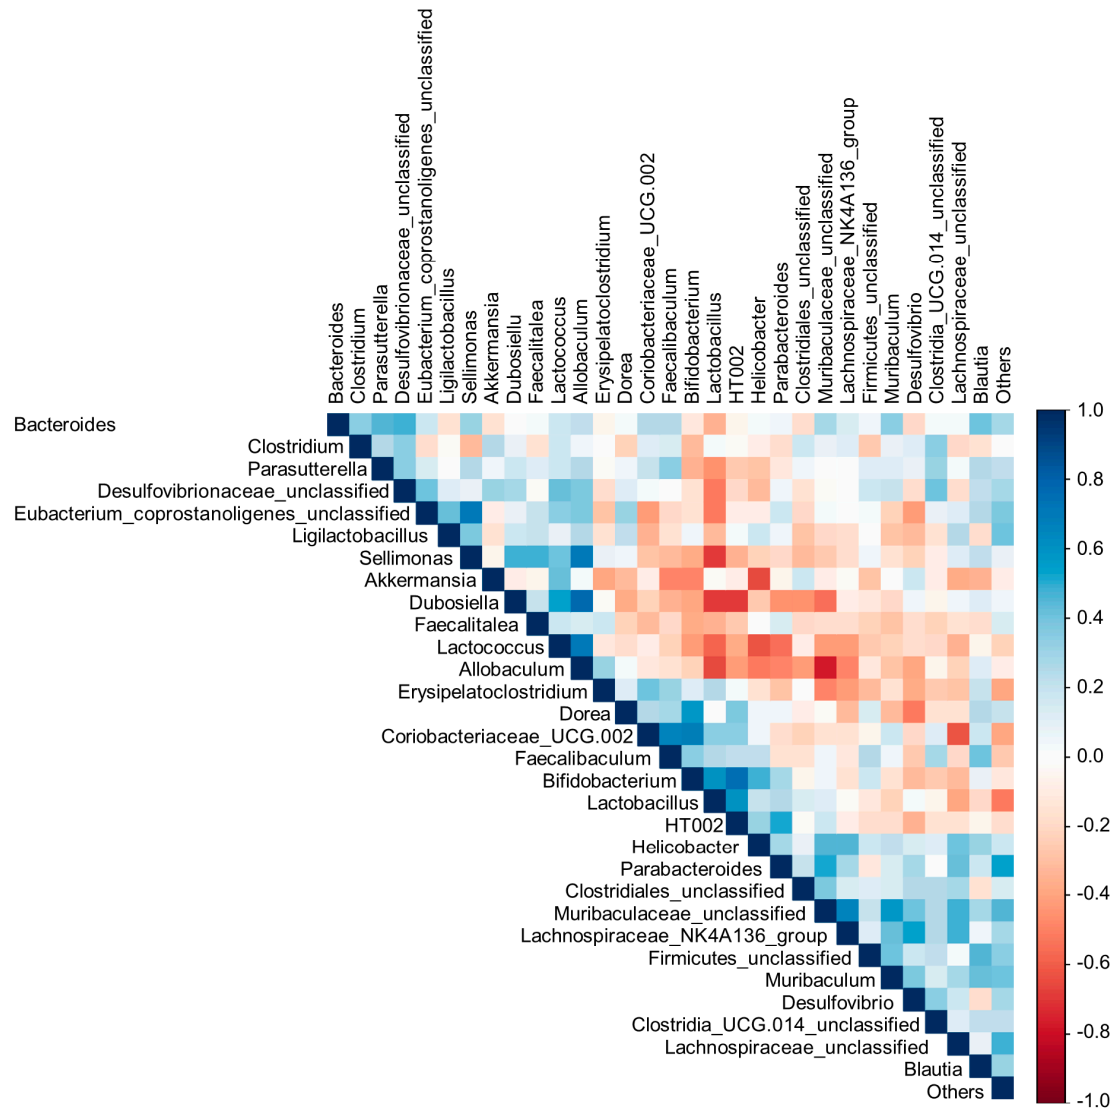

**Figure S5. Correlation analysis of differential gut microbiota between SIRT2 KO and SIRT2 WT NAFLD mice.** Spearman correlation analysis among gut microbiota at genus levels between the SIRT2 KO and SIRT2 WT groups. The correlation analysis value is represented by the colors of grids. Blue represents positive correlation, and red represents negative correlation (N=3/per group).
